# Recurrent excitation between motoneurons propagates across segments and is purely glutamatergic

G.S. Bhumbra\* and M. Beato\*

Short title: Recurrent excitation propagates across segments and is purely glutamatergic

**\*Address:** Department of Neuroscience, Physiology and Pharmacology, UCL, Gower Street London WC1E 6BT, UK

**Corresponding author:** Marco Beato ( [m.beato@ucl.ac.uk](mailto:m.beato@ucl.ac.uk) )

**Acknowledgments:** This work was supported by grants from the Leverhulme Trust (grant number RPG-2013-176) and the Biotechnology and Biological Sciences Research Council (BBSRC, grant number BB/L001454) to MB. We are grateful to Professor John Wood for providing the GCaMP6s mice and to Professor Rob Brownstone for helpful discussions during the course of this study.

## Abstract

Spinal motoneurons constitute the final output for the execution of motor tasks. In addition to innervating muscles, motoneurons project excitatory collateral connections to Renshaw cells and other motoneurons, but the latter have received little attention. We show that motoneurons receive strong synaptic input from other motoneurons throughout development and into maturity with fast type motoneurons systematically receiving greater recurrent excitation than slow type motoneurons. Optical recordings show that activation of motoneurons in one spinal segment can propagate to adjacent segments even in the presence of intact recurrent inhibition. Quite remarkably, while it is known that transmission at the neuromuscular junction is purely cholinergic and Renshaw cells are excited through both acetylcholine and glutamate receptors, here we show that neurotransmission between motoneurons is purely glutamatergic indicating that synaptic transmission systems are differentiated at different post-synaptic targets of motoneurons.

## 1 Introduction

2 Motoneurons (Mns) are the ultimate neural targets of effector commands issued from the  
3 central nervous system. Their activity is modulated by an intricate network of interneurons  
4 (Kiehn, 2016) that affect the spatial and temporal distribution of excitation to different motor  
5 pools (McCrea and Rybak, 2008). Mns also receive direct inputs from supraspinal tracts  
6 and sensory afferents, and their outputs are not confined to the peripheral muscles, but also  
7 include excitatory collateral terminals to Renshaw cells (RCs).

8 Early anatomical studies in the cat have shown that Mn collaterals invade the motor nuclei  
9 region and form synaptic contacts with other Mns (Cullheim et al., 1977). Electrophysiological  
10 evidence of functional connectivity between Mns has been presented in the adult cat (Gogan  
11 et al., 1977), tadpole (Perrins and Roberts, 1995), neonatal (Ichinose and Miyata, 1998) and  
12 juvenile (Jiang et al., 1991) rat, and newborn mice (Nishimaru et al., 2005). However despite  
13 these initial reports, no study to date has reported systematically the extent, distribution, and  
14 pharmacology of direct monosynaptic connections between Mns.

15 Here we demonstrate strong recurrent excitation between Mns that is maintained throughout

16 development into maturity. Fast type Mns receive greater recurrent excitation than slow type  
17 Mns. Under normal physiological conditions, recurrent excitation can override recurrent inhibi-  
18 tion and Mn firing in one spinal segment propagates to neighbouring segments. Remarkably,  
19 while acetylcholine and a mixture of acetylcholine and glutamate act at the neuromuscular  
20 junction and RC synapses respectively (Mentis et al., 2005, Nishimaru et al., 2005), neuro-  
21 transmission between Mns is purely glutamatergic.

## 22 **Results**

23 We performed paired recordings to measure the efficacy of unitary connections in fluores-  
24 cently labelled Mns innervating gastrocnemius. Simultaneous infrared and confocal imaging  
25 was used to identify and patch fluorescent Mns in a dorsal horn ablated spinal cord (Figure  
26 1A). Strychnine ( $0.5\ \mu\text{M}$ ) and gabazine ( $3\ \mu\text{M}$ ) were applied to block recurrent inhibition. Mns  
27 were patched in whole-cell voltage clamp while putative pre-synaptic cells were stimulated in  
28 a loose-cell attached configuration (see Methods) until an evoked response was detected in  
29 the post-synaptic cell. Figure 1B shows an example of a paired recording with an average  
30 evoked current of  $-34\ \text{pA}$ . A location map constructed from 14 out of the 18 recorded pairs  
31 (Figure 1C) shows that connected Mns tended to be within  $150\ \mu\text{m}$  from one another, but with  
32 no systematic relationship between distance and size of response (range  $11\text{--}125\ \text{pA}$ ).

33 The rise and decay times of evoked currents (Figure 1D, response size colour coded) were  
34 fast, with a median rise time of  $0.59\ \text{ms}$  and decay time of  $3.75\ \text{ms}$ . There was however no  
35 correlation between either of the kinetic parameters and the size of response. In oblique  
36 slice preparations (see Methods) we assessed the pharmacology of evoked responses (Figure  
37 1E). The postsynaptic current was fully abolished by bath-application of  $50\ \mu\text{M}$  APV and  $2\ \mu\text{M}$   
38 NBQX, to block AMPA and NMDA receptors respectively (Figure 1F, top). Identical results  
39 were obtained from all four pairs tested (Figure 1F, bottom).

40 Since the tested unitary connections might have represented a specific local subset from the  
41 entire population of Mn-Mn synapses, we investigated the pharmacology of currents evoked  
42 by ventral root (VR) stimulation, thus pooling responses to all inputs from a given segment

43 (Figure 2A). In the example of Figure 2A-C, we simultaneously recorded from a Renshaw  
44 cell (RC, Figure 2B, top, red) and a Mn (Figure 2B, bottom, blue). The RC response shown  
45 includes a second component originating from a gap junction (Lamotte d'Incamps et al., 2012),  
46 contacting a neighbouring RC in which VR stimulation evoked an action potential.

47 Whereas bath application of glutamate antagonists resulted in a reduction of the RC response  
48 to approximately 50 %, the response in the Mn is completely abolished. The remaining cholin-  
49 ergic component of the response in the RC was blocked by further application of 10 nM MLA  
50 and 5  $\mu$ M DH $\beta$ E to block  $\alpha 7$  and  $\alpha \beta$  receptors respectively (Figure 2C). Group data from 16  
51 Mn recordings are illustrated in Figure 2D). The mean latency ( $\pm$ S.E.M.) of responses of  
52  $1.60 \pm 0.13$  ms was consistent with monosynaptic responses to ventral root stimulation. In all  
53 cases application of glutamate antagonists resulted in complete suppression of evoked cur-  
54 rents (Figure 2D).

55 While the data from Figure 2D were obtained from juvenile mice (P7-14), we performed sim-  
56 ilar recordings from more mature animals (P15-25) to determine whether pure glutamatergic  
57 transmission is preserved throughout development. Figure 2E-F shows that the response  
58 is fully suppressed by glutamatergic blockade. In 20 Mns recorded in voltage-clamp (black,  
59 Figure 2G), or in current-clamp (blue, to reduce the duration of the stimulus artefact), gluta-  
60 matergic antagonists entirely suppressed responses, whereas prior cholinergic blockade had  
61 no significant effect ( $n = 6$ , Wilcoxon's sign-rank  $z = -0.53$ ,  $P = 0.600$ ).

62 We next investigated whether recurrent excitation could propagate across segments in coronal  
63 preparations (see Methods) from juvenile mice (P7-14) in which Mns innervating gastrocne-  
64 mius were labelled. Figure 3A illustrates recurrent excitatory post-synaptic currents (rEPSCs)  
65 recorded in L5 (left) and L4 (right) Mns while stimulating the L5 (upper, blue trace) or L4  
66 (lower, red trace) ventral root (VR). The rEPSC size from 43 recordings from L4 and L5 Mns  
67 is plotted against the distance from the L4/L5 border, colour coded to represent responses  
68 evoked by L4 (red) or L5 (blue) VR stimulation (Figure 3B). There were no obvious differences  
69 in rEPSC size between the two stimulated roots or between L4 and L5 motoneurons. Com-  
70 parison of rEPSCs from responses to VR stimulation from the same segment or neighbouring  
71 segment showed no significant differences (Figure 3B right, Wilcoxon's rank-sum  $z = 0.61$ ,

72  $P = 0.541$ ).

73 The mean latency ( $\pm$ S.E.M.) of responses of  $1.64\pm 0.09$  ms was consistent with monosy-  
74 naptic activation and not significantly different from those from oblique slices ( $1.60\pm 0.13$  ms,  
75 Wilcoxon's rank-sum  $z = -0.90$ ,  $P = 0.384$ ). Latencies of responses from Mns in neighbour-  
76 ing segments ( $1.77\pm 0.13$  ms) were longer compared to those recorded from within the same  
77 segment that was stimulated ( $1.43\pm 0.09$  ms, Wilcoxon's rank-sum  $z = -2.43$ ,  $P = 0.015$ ). The  
78 corresponding response jitter, quantified using the standard deviation of the latencies, were  
79 very small both within ( $0.08\pm 0.03$  ms) and across ( $0.08\pm 0.01$  ms) segments and a comparison  
80 between the two showed no significant difference in jitters (Wilcoxon's rank-sum  $z = -0.58$ ,  
81  $P = 0.559$ ). These results demonstrate that while the latency of synaptic responses may be  
82 greater across segments compared to within segments, they are both mediated by monosy-  
83 naptic connections.

84 We then assessed whether the magnitude of recurrent excitation was related to the intrinsic  
85 properties of post-synaptic Mns. Two types of Mns were identified according to their firing  
86 pattern at rheobase in current clamp recordings (Leroy et al., 2014). The first type (Figure 3C,  
87 left, purple) has high a rheobase and produces *delayed firing* with a pronounced increase in  
88 firing rate during positive current application and is associated with fast-type units. By contrast  
89 the second type (Figure 3C, right, green) has a lower rheobase and *immediate firing* with  
90 little change in spike frequency, characteristic of slow-type units (Leroy et al., 2014). High  
91 rheobase (Figure 3D, left) and accelerating initial firing (Figure 3D, middle) were correlated  
92 with the size of rEPSCs, with median values of 1814 pA in the delayed firing cells and 267 pA  
93 in the immediate firing cells. Comparison between the two groups confirmed a significant  
94 difference (Figure 3D right, Wilcoxon's rank-sum  $z = 3.72$ ,  $P < 0.001$ ).

95 Differences between the two cell types are also associated with their passive properties,  
96 with delayed firing Mns showing lower resistances (median 22 M $\Omega$ ) and higher capacitances  
97 (median 237 pF) than their immediate firing counterparts (median resistance 44 M $\Omega$ , median  
98 capacitance 125 pF) both at statistically significant levels (Wilcoxon's rank-sum  $|z| \geq 2.94$ ,  
99  $P \leq 0.003$ ). Recurrent excitatory responses were recorded from delayed firing (Figure 3E,  
100 purple) and immediate firing (Figure 3E, green) cells in both voltage clamp (top) and cur-

101 rent clamp (bottom). Pooling all cell types together, correlations were observed between the  
102 size of response and resistance or capacitance (Spearman's  $|r| \geq 0.516$ ,  $P < 0.001$ , Figure  
103 3F).

104 The presence of strychnine and gabazine during electrophysiological recordings precluded  
105 evaluation of whether recurrent excitation could override recurrent inhibition, We therefore  
106 conducted calcium imaging experiments in mice selectively expressing GCaMP6s in Mns to  
107 evaluate the propagation of recurrent excitation across different segments with recurrent in-  
108 hibition intact. Figure 4A-C illustrates a coronal preparation with a suction electrode applied  
109 to the L5 ventral root (Figure 4A, left). Calcium signals were acquired throughout the dorsal  
110 motor column of L4 and L5 (Figure 4A, middle) with 146 ms frame interval before, during, and  
111 following a train of three VR stimulations at 30 Hz. The signal from regions of interest, defined  
112 within the outline of Mn somata, was evaluated for the period of acquisition under control con-  
113 ditions, in the presence of 0.5  $\mu\text{M}$  strychnine and 3  $\mu\text{M}$  gabazine, and following application of  
114 50  $\mu\text{M}$  APV and 2  $\mu\text{M}$  NBQX (Figure 4A, right).

115 In control, recurrent excitation evoked spikes in Mns from both L4 and L5 segments, as shown  
116 by running the medians and inter-quartile ranges of the relative fluorescence signal (Figure 4B,  
117 red) throughout both segments. Bath application of strychnine and gabazine resulted in sub-  
118 stantial amplification of responses throughout the motor column (Figure 4B, green) whereas  
119 additional application of glutamatergic antagonists abolished responses from the L4 segment  
120 and substantially attenuated those from L5 Mns (Figure 4B, blue). The residual response  
121 in L5 Mns reflects antidromic activation. Scattergrams, colour-coded by regions, comparing  
122 control responses to those during application of inhibitory antagonists (Figure 4C, left) and ad-  
123 ditional glutamatergic blockade (Figure 4C, right) confirm that while responses were greater  
124 in the lumbar regions closer to the stimulated VR, the relative effects of block of recurrent  
125 inhibition, or excitation, were similar throughout L4 and L5.

126 Group data from 461 Mns from 7 preparations are shown in Figure 4D, comparing responses  
127 within and across segments for the three conditions. In control, responses were significantly  
128 greater within the stimulated segment compared to outside (Figure 4D, left, Wilcoxon's rank-  
129 sum  $z = 8.50$ ,  $P < 0.001$ ) and these difference were maintained after block of inhibition

130 (Figure 4D, middle) and excitation (Figure 4D, right) ( $z \geq 7.23$ ,  $P < 0.001$ ). Pooling Mns  
131 from both segments, blockade of inhibition consistently increased the signal (Wilcoxon's sign-  
132 rank  $z = -18.59$ ,  $P < 0.001$ ) whereas a significant reduction in signal was observed following  
133 additional application of glutamatergic antagonists ( $z = 18.20$ ,  $P < 0.001$ ). Residual firing  
134 was mostly confined to Mns within the stimulated segment through antidromic activation, thus  
135 confirming the purely glutamatergic nature of recurrent excitation.

## 136 Discussion

137 Our experiments show that strong recurrent excitation between Mns is maintained throughout  
138 development and fast Mns receive greater recurrent excitation than slow ones. We demon-  
139 strate that synaptic transmission between Mns is purely glutamatergic. While it could be  
140 argued that the observed small unitary post-synaptic responses ( $\sim 100$  pA) would have little  
141 effect on the excitability of Mns whose somata are very large, ventral root stimulation evoked  
142 responses usually exceeding 1 nA indicating extensive convergence of segmental Mn popula-  
143 tions.

144 The variation in the magnitude of rEPSCs is associated with Mn classification into delayed and  
145 immediate firing types. Larger responses were systematically observed in the delayed firing,  
146 low resistance, and high capacitance cells. Our results are thus consistent with a structural  
147 connectivity in which the fast-type larger Mns receive stronger recurrent excitation compared  
148 to slow-type smaller cells. This pattern of connectivity suggests that recurrent excitation could  
149 play a role in sequential recruitment of fast-type units during motor tasks in which progressively  
150 increasing muscular forces are needed. Alternatively, recurrent excitation might represent a  
151 closed-loop amplification circuit that reinforces and increases the firing rate preferentially in  
152 fast-type Mns and thus rapidly increase muscle contraction strength when required.

153 In neonatal animals, VR stimulation can induce fictive locomotion (Mentis et al., 2005) and  
154 entrain the spontaneous rhythmic bursting induced by block of inhibition (Bonnot et al., 2009).  
155 Furthermore, optogenetic activation or silencing of motor pools alters the frequency and phase  
156 of chemically induced fictive locomotion (Falgairolle et al., 2017). These effects cannot be

157 explained solely by recurrent excitation and may provide evidence for Mn collaterals con-  
158 tacting unidentified interneurons (Machacek and Hochman, 2006). In our electrophysiological  
159 recordings during pharmacological blockade of recurrent inhibition, we often observed a  
160 late disynaptic component that may result from orthodromic activation of Mn pools not an-  
161 tidromically activated by VR stimulation. Such recruitment implies the existence of a positive-  
162 feedback amplifying circuit whose tendency to reverberate may be suppressed by recurrent  
163 inhibition.

164 However, the recurrent excitation characterised in the present study comprises predominantly  
165 a monosynaptic component and this is evidenced by three observations. First, the connec-  
166 tivity between Mn pairs must have been monosynaptic. Second, the latency of responses  
167 within ( $1.43 \pm 0.09$  ms) and between ( $1.77 \pm 0.13$  ms) lumbar segments were within the time-  
168 scale of neurotransmission through only a single synapse. Finally, the response jitters within  
169 ( $0.08 \pm 0.03$  ms) and between ( $0.08 \pm 0.01$  ms) segments were very small and virtually identi-  
170 cal. These observations are only consistent with a monosynaptic connectivity between Mns  
171 both within the same segment and across neighbouring segments. While the occurrence of  
172 synaptic projections between Mns crossing spinal segments may be regarded as unusual, it  
173 is perfectly compatible with the known rostro-caudal distribution of Mn dendritic trees which  
174 may span over a millimetre in juvenile mice with little or no change into adulthood (Li et al.,  
175 2005).

176 A glutamate receptor-dependent effect on Mn EPSPs evoked by VR stimulation has been  
177 reported previously (Jiang et al., 1991) but it was attributed to afferent fibres within the root  
178 (Coggeshall, 1980), a possibility now excluded by subsequent labelling studies (Mentis et  
179 al., 2005). A previous study has reported a purely cholinergic response to VR stimulation  
180 in a small proportion (2/9) of Mns (Nishimaru et al., 2005). Across all electrophysiological  
181 recordings of the present study however, there was not a single instance of a cholinergic  
182 component. The origin of such a discrepancy may result from differences in maturity, since  
183 in the previous study (Nishimaru et al., 2005) neonatal mice (P0-P4) were used, while our  
184 experiments were performed on mice of at least weight bearing age (P7-P25).

185 Neurotransmission between Mns is purely glutamatergic, yet following normal maturation,



186 the neuromuscular junction is solely cholinergic (Borodinsky and Spitzer, 2007) and synap-  
187 tic transmission of recurrent collaterals onto Renshaw cells is mixed with both cholinergic and  
188 glutamatergic components (Lamotte d'Incamps et al., 2017). This remarkable dissociation  
189 demonstrates a differentiation of neurotransmission systems on the basis of the different post-  
190 synaptic targets of Mns. However, the presence of vesicular glutamate transporters in Mn  
191 collateral terminals is still controversial. Immunohistochemistry and *in situ* hybridization stud-  
192 ies have reported the expression of the vesicular transporter VGlut2 in some Mns terminals  
193 onto RCs that are either positive (Nishimaru et al., 2005) or negative (Herzog et al., 2004) for  
194 the vesicular acetylcholine transporter. These respective findings indicate either coexistence  
195 or segregation of cholinergic and glutamatergic transmission of Mns onto RCs.

196 Others however have not detected the presence of VGlut2, or any other vesicular glutamate  
197 transporter, in Mn terminals (Mentis et al., 2005, Liu et al., 2009). It is possible that such  
198 discrepancies arise from undetectable albeit functional expression levels of VGlut2. Another  
199 possibility is the existence of an unidentified vesicular glutamate transporter (Mentis et al.,  
200 2005, Liu et al., 2009). This hypothesis is supported by the presence of glutamate releasing  
201 C-fibres in the dorsal horn that are nevertheless negative for all known vesicular glutamate  
202 transporters (Todd et al., 2003, Alvarez et al., 2004). Since many Mn terminals may contain  
203 more aspartate than glutamate (Richards et al., 2014), it has been proposed that the released  
204 neurotransmitter could be aspartate. However, aspartate alone cannot activate AMPA recep-  
205 tors that mediate responses of RCs (Lamotte d'Incamps and Ascher, 2008) or of the Mns  
206 characterised in the present study. Glutamate thus remains the most likely candidate.

## 207 **Materials and Methods**

208 All experiments were carried out in accordance with the Animal (Scientific Procedures) Act  
209 (Home Office, UK, 1986) and were approved by the UCL Ethical Committee, under project  
210 licence number 70/7621. Experiments were performed on preparations obtained from male  
211 or female mice bred using a C57BL/6J background. For electrophysiological experiments with  
212 simultaneous recordings from motoneurons (Mns) and Renshaw cells (RCs) a transgenic

213 strain, in which the enhanced green fluorescent protein (EGFP) is expressed under the control  
214 of the promotor of the neuronal glycine transporter GlyT-2 (Zeilhofer et al., 2005), was used to  
215 label glycinergic interneurons.

## 216 **Spinal cord preparations**

217 Following anaesthesia by intraperitoneal injection of a mixture of ketamine/xylazine (80 mg/kg  
218 and 10 mg/kg respectively), both juvenile and mature mice were decapitated and the spinal  
219 cord dissected in normal ice cold aCSF containing (in mM) 113 NaCl, 3 KCl, 25 NaHCO<sub>3</sub>,  
220 1 NaH<sub>2</sub>PO<sub>4</sub>, 2 CaCl<sub>2</sub>, 2 MgCl<sub>2</sub>, and 11 D-glucose (same solution was used for recording).  
221 The spinal cord was then glued onto an agar block and affixed to the chamber of a vibrating  
222 slicer (HM 650V, Microm). We used a slicing solution containing (in mM) 130 K-gluconate, 15  
223 KCl, 0.05 EGTA, 20 HEPES, 25 D-glucose, 3 kynurenic acid and pH 7.4 with NaOH (Dugue  
224 et al., 2005). For cutting oblique slices, the cord was glued to an agar block cut at a 45  
225 degrees angle, with the ventral side facing the direction of the blade (Lamotte d'Incamps et  
226 al., 2017).

227 For coronally sliced preparations in which the dorsal horns were ablated, the cord was glued  
228 horizontally with the ventral surface facing upwards. A blade was used to transect the cord at  
229 the L1-L2 boundary at an angle that allowed visualization of the exact position of the central  
230 canal under a dissection microscope. The vibratome blade was then aligned to the central  
231 canal and the ventral portion of the cord was sliced away from the dorsal part. Alignment  
232 with the central canal was essential to ensure a consistent dorsoventral level of the ablation  
233 across different preparations and to retain the dorsal motor nuclei near the cut surface of the  
234 tissue.

235 Identical procedures were used for juvenile (P7-14) and mature (P15-25) animals. For older  
236 animals we routinely cut the first slice within 8 minutes following decapitation. Since spinal  
237 cord preparations are extremely sensitive to anoxia especially prior to slicing, we found that  
238 minimizing the time to obtain the first slice consistently resulted in viable preparations with  
239 healthy motoneurons (Lamotte d'Incamps et al., 2017).

## 240 **Electrophysiology**

241 All recordings from post-synaptic motoneurons were performed with a Molecular Devices  
242 Axopatch 200B amplifier, filtered at 5 kHz and digitized at 50 kHz. Patch pipettes were pulled  
243 to resistances in the range of 0.8–2 M $\Omega$  when filled with (in mM) 125 K-gluconate, 6 KCl, 10  
244 HEPES, 0.1 EGTA, 2 Mg-ATP, pH 7.3 with KOH, and osmolarity of 290–310 mOsm. During  
245 voltage-clamp recordings, Mns were clamped at –60 mV with series resistances in the range  
246 of 2–10 M $\Omega$  compensated by 60-80%.

247 During paired recordings, loose cell attached stimulation was used to evoke spikes in puta-  
248 tive pre-synaptic motoneurons using an ELC-03X (NPI Instruments) amplifier and a 4–5 M $\Omega$   
249 pipette filled with normal aCSF (Bhumbra et al., 2014). Ventral root stimulation was delivered  
250 to evoke recurrent excitatory post-synaptic currents in motoneurons using a glass suction  
251 electrode whose tip was cut to correspond with the size of the ventral root (Moore et al.,  
252 2015). The stimulation intensity was increased until the size of the rEPSC remained constant,  
253 typically at 5 $\times$  threshold. In order to exclude direct stimulation of the ventral white matter, ven-  
254 tral roots were only used if they were of sufficient length to afford no possible physical contact  
255 between the slice and suction pipette. This was tested before and after each recording by  
256 confirming that side-to-side movement of the suction pipette resulted only in movement of the  
257 root and not the slice.

258 For measuring the size of the excitatory response in some Mns, where it was necessary  
259 to prevent action potentials, cells were hyperpolarised below their resting membrane po-  
260 tential. Measurements of synaptic current and potentials from these recordings were ad-  
261 justed to their predicted value at –60 mV assuming a reversal potential of 0 mV for excita-  
262 tory conductances. All electrophysiological experiments were performed in the presence of  
263 0.5  $\mu$ M strychnine and 3  $\mu$ M gabazine. Where indicated, excitatory receptors were blocked  
264 using D-2-amino-5-phosphonopentanoic acid (APV), 1,2,3,4-tetrahydrobenzo(f)quinoxaline-7-  
265 sulphonamide (NBQX), methyllycaconitine (MLA) or dihydro- $\beta$ -erythroidine (DH $\beta$ E).

## 266 **Intramuscular injections**

267 In order to label motoneurons innervating the ankle flexor gastrocnemius muscle, intramus-  
268 cular injections were performed 2-5 days prior to recording. Inhalant isoflurane was used  
269 for the induction and maintenance of anaesthesia. Traction was applied to the lower limb and  
270 an incision was made through the skin and deep fascia overlying the muscle. A Hamilton  
271 syringe loaded with a glass needle was used to inject 1  $\mu$ l of CTB-Alexa-Fluor-555 (0.2% in  
272 1 $\times$  phosphate buffer saline) into the middle of the muscle belly over a period of at least 1  
273 minute. The skin was closed by suture using a buried stitch before cessation of anaesthesia  
274 and recovery.

## 275 **Calcium imaging**

276 Calcium imaging experiments were performed on animals selectively expressing the geneti-  
277 cally encoded calcium indicator GCaMP6s in motoneurons. These mice were generated by  
278 crossing mice expressing Cre under the control of choline-acetyltransferase (ChAT-Cre, JAX  
279 mouse line number 006410) with animals with the gene expressing GCaMP6 flanked by a  
280 flox-Stop cassette (JAX mouse line number 028866, Madisen et al., 2015). Upon recombina-  
281 tion with Cre, GCaMP6 is selectively expressed in motoneurons and other cholinergic cells  
282 of the offspring. Since the only other population of ChAT positive lumbar spinal cells are the  
283 cholinergic partition neurons located around the central canal, there was no ambiguity in the  
284 identification of motoneurons from their basal GCaMP6 fluorescence and position within the  
285 motor nuclei.

286 Dorsal horn ablated coronal slice preparations (P9-12) were used for imaging experiments  
287 to visualise the dorsal motor nuclei in the L4 and L5 segments containing Mns innervating  
288 tibialis anterior, gastrocnemius, and peroneus longus close the cut surface. A laser scanning  
289 confocal unit (D-Eclipse C1, Nikon) with a diode laser ( $\lambda = 488$  nm, power output from optic  
290 fibre 3–5 mW) was used to locate and record calcium signals from Mns reaching a depth of  
291 approximately 100  $\mu$ m from the surface. Fields of 128x64 pixels (pixel size 1.38  $\mu$ m and dwell  
292 7.2  $\mu$ s) were scanned with a frame interval of 146 ms over different regions throughout the

293 dorsal motor column. Trains of 3 stimuli at 30 Hz were delivered to the ventral root (L4 or  
294 L5) while images were being acquired from at least 1 s before the onset of the first stimulus  
295 pulse. For each field, calcium signals were acquired for a total of 35 frames corresponding to  
296 approximately 5 s, and the position of each field was recorded.

297 Post-hoc analysis was performed to quantify Mn responses. Within each field, single Mns  
298 were identified by their fluorescence and regions of interests were defined by the contour  
299 profiles of their somata. The time course of excitation was measured using the change in  
300 mean fluorescence following stimulation divided by the baseline average. In some cases, slow  
301 drifts in fluorescence was corrected by fitting an exponential to the initial trace before the  
302 stimulus. Changes in fluorescence exceeding two standard deviations of the baseline noise  
303 were measured over a 1 s window following ventral root stimulation.

## References

- Alvarez FJ, Villalba RM, Zerda R, Schneider SP (2004) Vesicular glutamate transporters in the spinal cord, with special reference to sensory primary afferent synapses. *J Comp Neurol* **472**(3):257–80.
- Bhumbra GS, Bannatyne BA, Watanabe M, Todd AJ, Maxwell DJ, Beato M (2014) The recurrent case for the renshaw cell. *J Neurosci* **34**(38):12919–32.
- Bonnot A, Chub N, Pujala A, O'Donovan M (2009) Excitatory actions of ventral root stimulation during network activity generated by the disinhibited neonatal mouse spinal cord. *J. Neurophysiol.* **101**(6):2995–3011.
- Borodinsky LN, Spitzer NC (2007) Activity-dependent neurotransmitter-receptor matching at the neuromuscular junction. *Proc Natl Acad Sci U S A* **104**(1):335–40.
- Coggeshall RE (1980) Law of separation of function of the spinal roots. *Physiol Rev* **60**(3):716–55.

- Cullheim S, Kellerth J, Conradi S (1977) Evidence for direct synaptic interconnections between cat spinal alpha-motoneurons via the recurrent axon collaterals: a morphological study using intracellular injection of horseradish peroxidase. *Brain Res.* **132**(1):1–10.
- Dugue G, Dumoulin A, Triller A, Dieudonne S (2005) Target-dependent use of co-released inhibitory transmitters at central synapses. *J Neurosci* **25**(28):6490–6498.
- Falgairolle M, Puhl JG, Pujala A, Liu W, O'Donovan MJ (2017) Motoneurons regulate the central pattern generator during drug-induced locomotor-like activity in the neonatal mouse. *Elife* **6**:In press.
- Gogan P, Gueritaud J, Horcholle-Bossavit G, Tyc-Dumont S (1977) Direct excitatory interactions between spinal motoneurons of the cat. *J Physiol* **272**(3):755–767.
- Herzog E, Landry M, Buhler E, Bouali-Benazzouz R, Legay C, Henderson CE, Nagy F, Dreyfus P, Giros B, El Mestikawy S (2004) Expression of vesicular glutamate transporters, vglut1 and vglut2, in cholinergic spinal motoneurons. *Eur J Neurosci* **20**(7):1752–60.
- Ichinose T, Miyata Y (1998) Recurrent excitation of motoneurons in the isolated spinal cord of newborn rats detected by whole-cell recording. *Neurosci Res.* **31**(3):179–187.
- Jiang ZG, Shen E, Wang MY, Dun NJ (1991) Excitatory postsynaptic potentials evoked by ventral root stimulation in neonate rat motoneurons in vitro. *J Neurophysiol* **65**(1):57–66.
- Kiehn O (2016) Decoding the organization of spinal circuits that control locomotion. *Nat Rev Neurosci* **17**(4):224–38.
- Lamotte d'Incamps B, Ascher P (2008) Four excitatory postsynaptic ionotropic receptors coactivated at the motoneuron-renshaw cell synapse. *J Neurosci* **28**(52):14121–31.
- Lamotte d'Incamps B, Bhumbra GS, Foster JD, Beato M, Ascher P (2017) Segregation of glutamatergic and cholinergic transmission at the mixed motoneuron renshaw cell synapse. *Sci Rep* **7**(1):4037.
- Lamotte d'Incamps B, Krejci E, Ascher P (2012) Mechanisms shaping the slow nicotinic synaptic current at the motoneuron-renshaw cell synapse. *J Neurosci* **32**(24):8413–23.

- Leroy F, Lamotte d'Incamps B, Imhoff-Manuel RD, Zytnicki D (2014) Early intrinsic hyperexcitability does not contribute to motoneuron degeneration in amyotrophic lateral sclerosis. *Elife* **3**.
- Li Y, Brewer D, Burke RE, Ascoli GA (2005) Developmental changes in spinal motoneuron dendrites in neonatal mice. *J Comp Neurol* **483**(3):304–17.
- Liu TT, Bannatyne BA, Jankowska E, Maxwell DJ (2009) Cholinergic terminals in the ventral horn of adult rat and cat: evidence that glutamate is a cotransmitter at putative interneuron synapses but not at central synapses of motoneurons. *Neuroscience* **161**(1):111–22.
- Machacek DW, Hochman S (2006) Noradrenaline unmasks novel self-reinforcing motor circuits within the mammalian spinal cord. *J Neurosci* **26**(22):5920–8.
- Madisen L, Garner AR, Shimaoka D, Chuong AS, Klapoetke NC, Li L, van der Bourg A, Niino Y, Egolf L, Monetti C, Gu H, Mills M, Cheng A, Tasic B, Nguyen TN, Sunkin SM, Benucci A, Nagy A, Miyawaki A, Helmchen F, Empson RM, Knoepfel T, Boyden ES, Reid RC, Carandini M, Zeng H (2015) Transgenic mice for intersectional targeting of neural sensors and effectors with high specificity and performance. *Neuron* **85**(5):942–58.
- McCrea D, Rybak I (2008) Organization of mammalian locomotor rhythm and pattern generation. *Brain Res.Rev.* **57**(1):134–146.
- Mentis G, Alvarez F, Bonnot A, Richards D, Gonzalez-Forero D, Zerda R, O'Donovan M (2005) Noncholinergic excitatory actions of motoneurons in the neonatal mammalian spinal cord. *PNAS* **102**(20):7344–7349.
- Moore NJ, Bhumbra GS, Foster JD, Beato M (2015) Synaptic connectivity between renshaw cells and motoneurons in the recurrent inhibitory circuit of the spinal cord. *J Neurosci* **35**(40):13673–86.
- Nishimaru H, Restrepo C, Ryge J, Yanagawa Y, Kiehn O (2005) Mammalian motor neurons corelease glutamate and acetylcholine at central synapses. *PNAS* **102**(14):5245–5249.
- Perrins R, Roberts A (1995) Cholinergic and electrical synapses between synergistic spinal motoneurons in the xenopus laevis embryo. *J Physiol* **485** ( Pt 1):135–44.

Richards DS, Griffith RW, Romer SH, Alvarez FJ (2014) Motor axon synapses on renshaw cells contain higher levels of aspartate than glutamate. *PLoS One* **9**(5):e97240.

Todd AJ, Hughes DI, Polgar E, Nagy GG, Mackie M, Ottersen OP, Maxwell DJ (2003) The expression of vesicular glutamate transporters vglut1 and vglut2 in neurochemically defined axonal populations in the rat spinal cord with emphasis on the dorsal horn. *Eur J Neurosci* **17**(1):13–27.

Zeilhofer H, Studler B, Arabadzisz D, Schweizer C, Ahmadi S, Layh B, Bosl M, Fritschy J (2005) Glycinergic neurons expressing enhanced green fluorescent protein in bacterial artificial chromosome transgenic mice. *J Comp Neurol*. **482**(2):123–141.



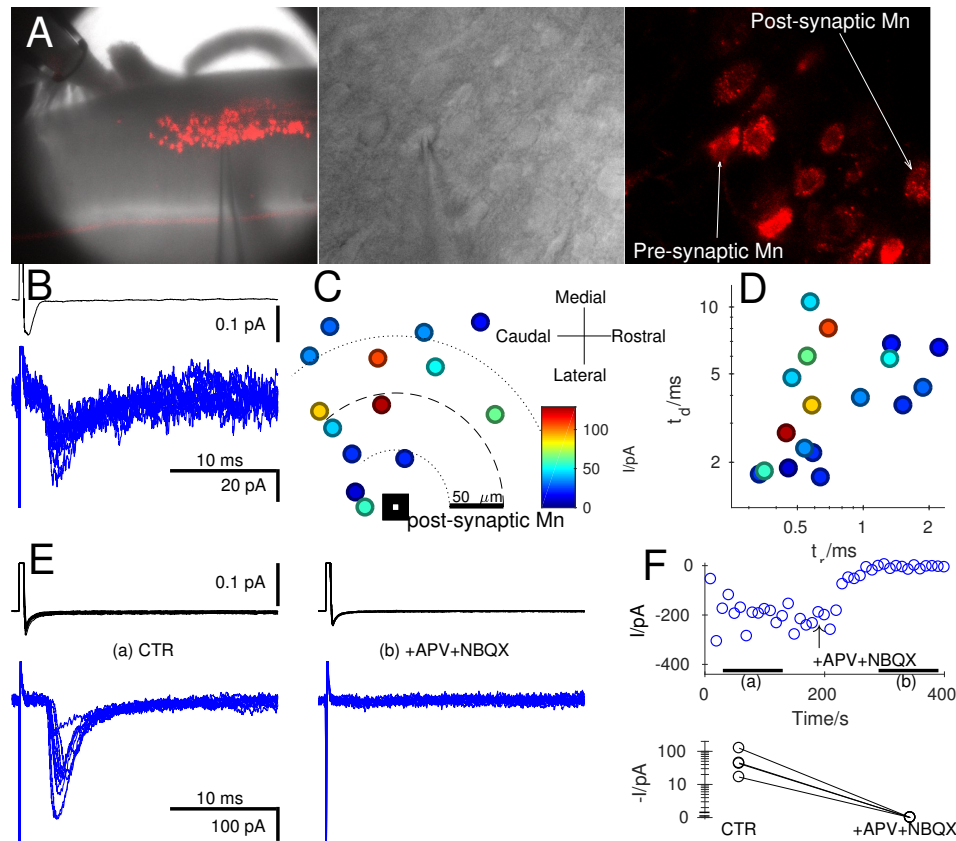

Figure 1: Paired recordings from motoneurons showed small unitary currents that were purely glutamatergic. Prior intramuscular injection of gastrocnemius with CTB-Alexa-Fluor-555 fluorescently labelled the dorsal motor column (A) within the coronal preparation (left) for simultaneous visualisation of motoneurons using infrared (middle) and confocal (right) optics. Pre-synaptic cells were stimulated in loose cell-attached voltage-clamp (B, upper trace) while recording evoked post-synaptic responses in whole-cell voltage clamp (B, lower trace). Connected motoneurons were usually within  $150\ \mu\text{m}$  of one other and in most paired recordings (14/18) their respective locations were recorded. Graph C plots the relative position of each pre-synaptic Mn in relation to the post-synaptic cell, with colour-coded size of the corresponding responses. A similar colour-code and scale is used in graph D, showing decay time ( $t_d$ ) against the rise time ( $t_r$ ). Using oblique slice preparations (see text), we investigated the pharmacology of the synapse. Panel E shows a representative recording in control (CTR, left) and following glutamatergic blockade (E, right) using APV and NBQX. The time course of changes in evoked responses during the bath application of the antagonists showed complete suppression of currents (F, top). Similar effects were observed for all four paired recordings (F, bottom).

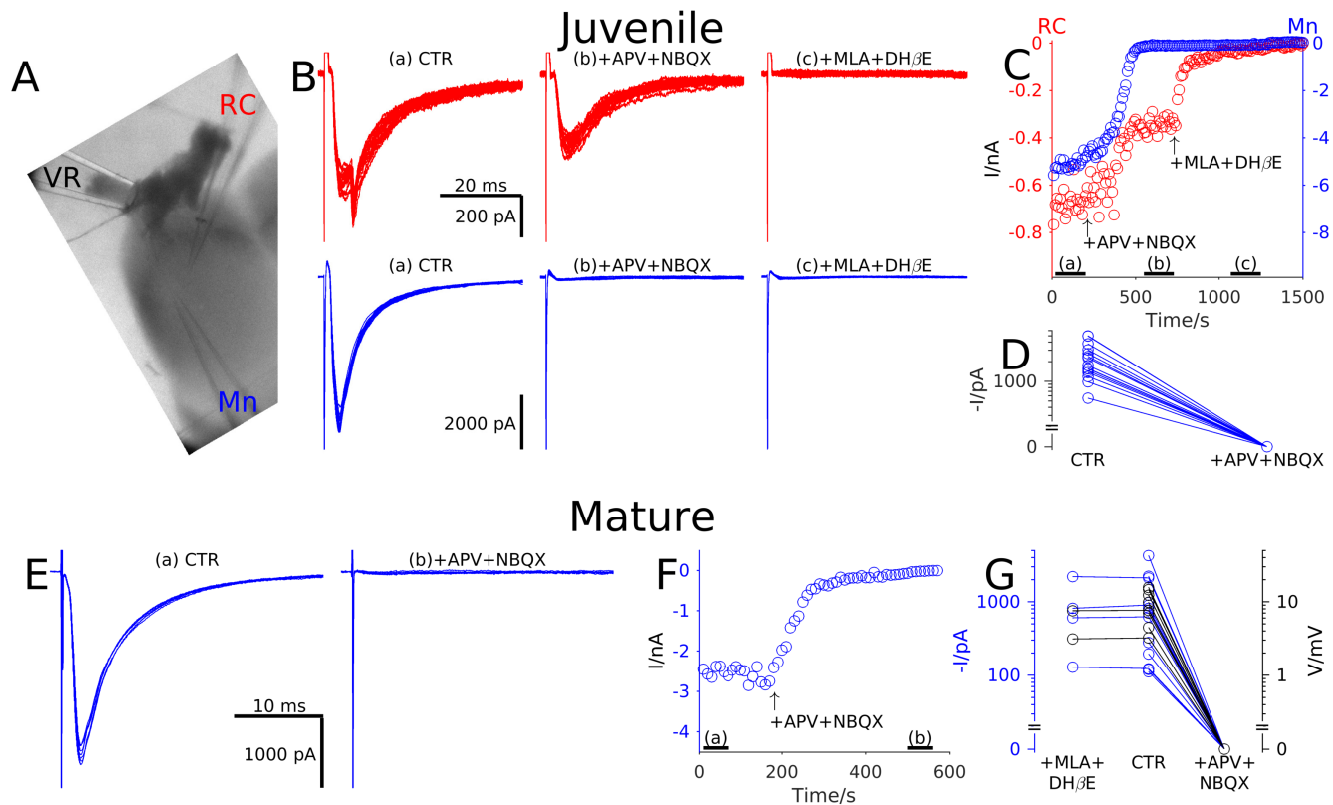

Figure 2: Electrophysiological recordings from both juvenile and mature preparations showed that recurrent excitation in motoneurons is purely glutamatergic. In oblique slice preparations (A) a suction electrode was used to stimulate the ventral root (VR) while recording responses from a motoneuron (Mn) and, in the illustrated example, also from a Renshaw cell (RC). Note that the RC response shown includes a second component originating from a gap junction with a neighbouring RC. Panel B illustrates post-synaptic responses (stimulus artefacts truncated) of the RC (red, top) and Mn (blue, bottom) in control (left), in the presence of glutamatergic antagonists (middle) and following block of cholinergic transmission with MLA and DH $\beta$ E (right). The time course of changes in currents (C, top) during application of the antagonists showed partial attenuation of RC responses and full suppression of Mn responses in the presence of glutamatergic antagonists. RC currents were only abolished by block of cholinergic receptors. In all Mns tested the rEPSC was completely abolished by glutamatergic antagonists (D). Similar experiments were performed on mature preparations in which Mn responses to VR stimulation were recorded in control (E, left) and during glutamatergic blockade (E, right). Once again the time course of changes in responses (F) showed complete suppression of Mn responses in the presence of glutamatergic antagonists. Graph G summarises the group data from Mns recorded in voltage clamp (black) and current clamp (blue) showing no effect following bath application of cholinergic antagonists whereas glutamatergic blockade completely abolishes responses.

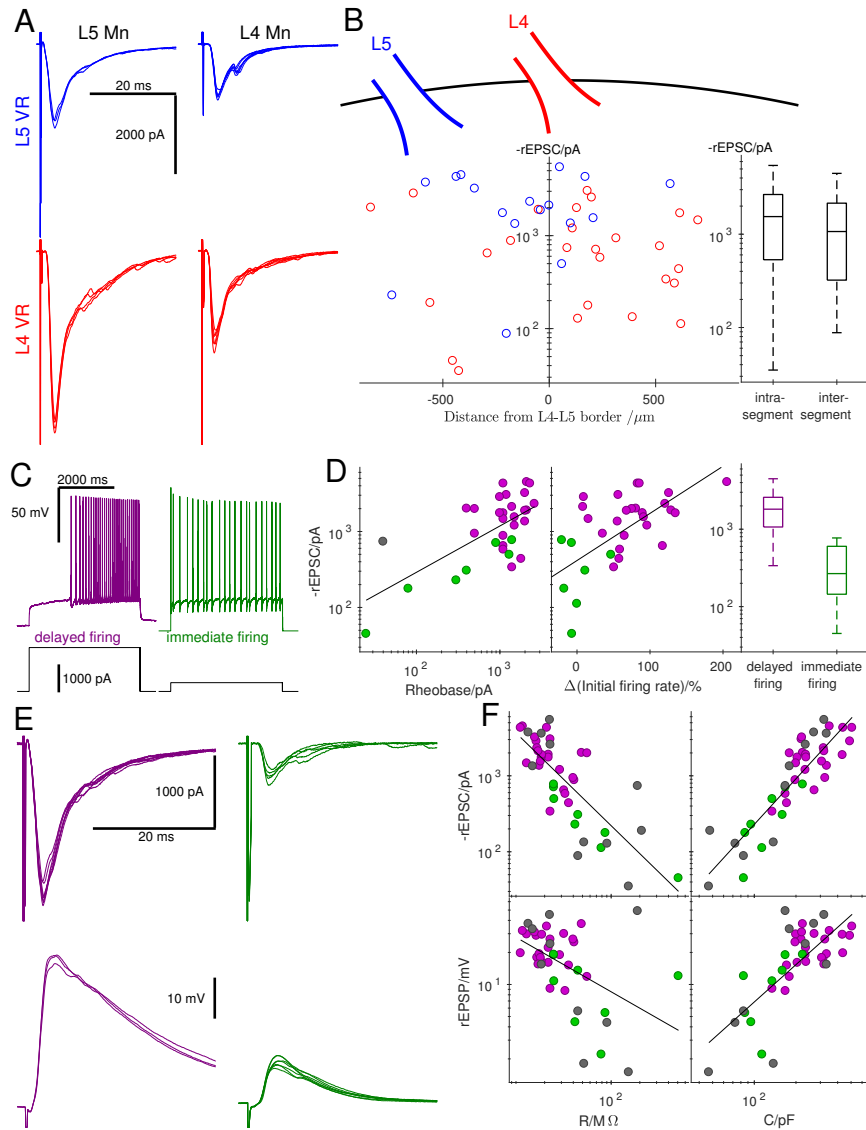

Figure 3: Recordings from coronal preparations showed that the magnitude of rEPSCs was related not to the position of the Mn but to its firing type. Example traces of evoked responses (stimulus artefacts truncated) of motoneurons located in L5 (A, left) and L4 (A, right) segments are illustrated following stimulation of the L5 (A, top, blue) and L4 (A, bottom, red) ventral root; the response in the top right trace exhibited a late component, suggesting activation of a disynaptic pathway. Panel B shows the size of rEPSCs recorded from all Mns against their distance from L4-L5 border (rostral positive) colour-coded according to whether L5 (blue) or L4 (red) VR was stimulated. There was no systematic association between rEPSCs and position as shown in the box-and-whiskers plot (B, right) comparing intra-segmental to inter-segmental responses. Two Mn cell types were distinguished using current-clamp recordings on the basis of whether at rheobase, positive current application elicited delayed (C, left, purple) or immediate (C, right, green) firing. Delayed firing cells (purple) were associated with a high rheobase (D, left), an accelerating initial firing rate (D, middle), and large evoked rEPSCs (D, right) in comparison to immediate firing cells (green). The traces in E illustrate representative responses to VR stimulation from a delayed firing cell (purple, left) and immediate firing cell (green, right) recorded in voltage-clamp (top) and current-clamp (bottom). Graph F shows the group data, plotting the rEPSCs and rEPSPs against cell resistance and capacitance, using grey circles to denote cells that were not identified by their firing pattern at rheobase. In all four cases, correlations were observed demonstrating that responses were greater in larger Mns, which tended to be of the delayed firing type.

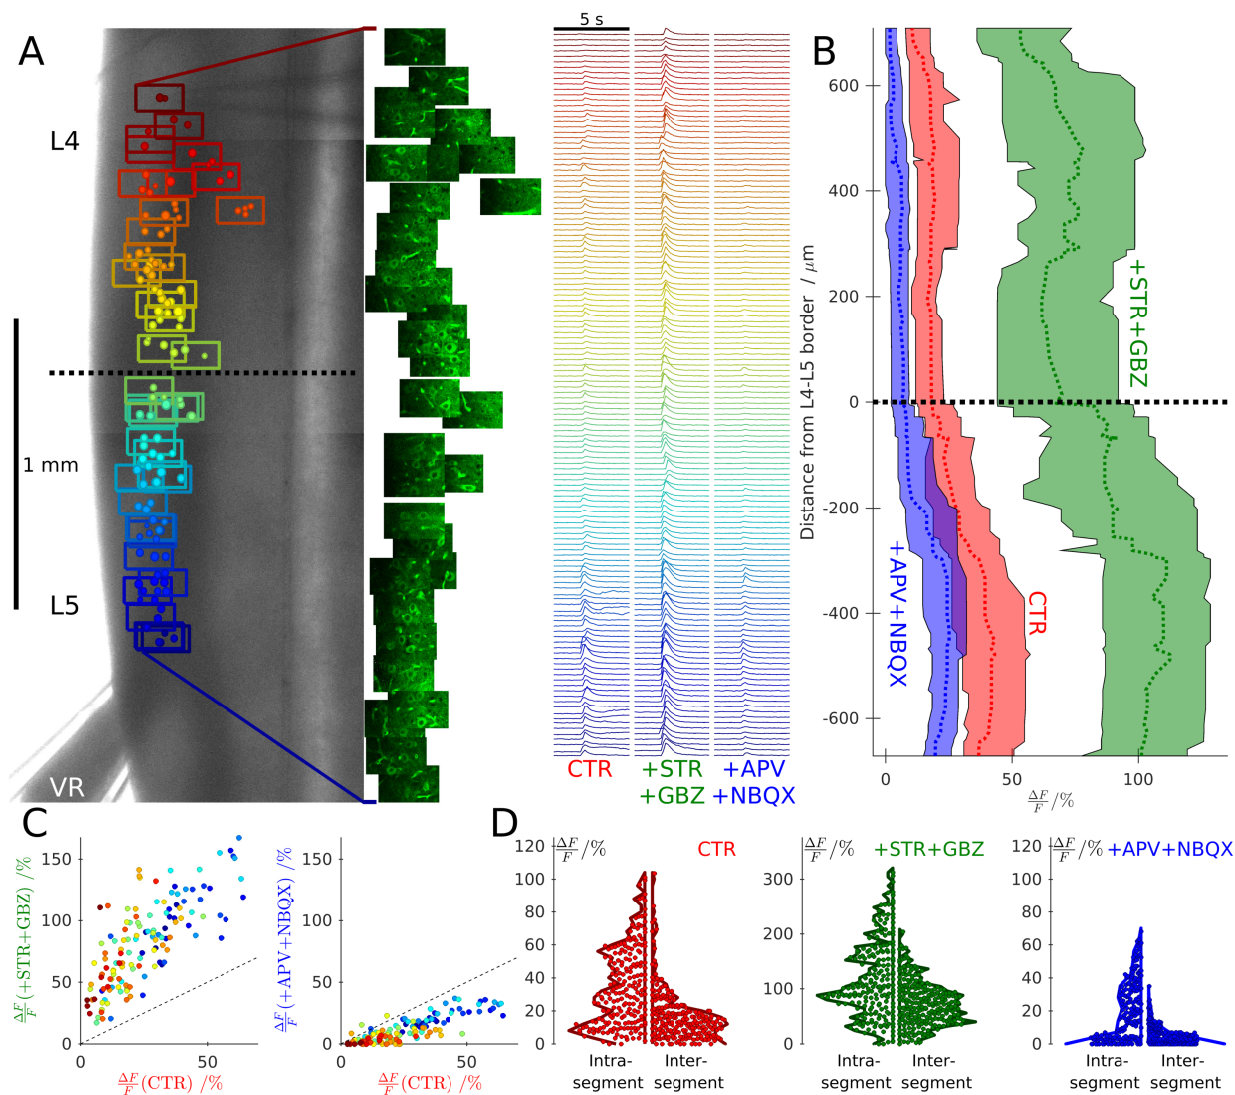

Figure 4: Calcium imaging from coronal preparations showed that recurrent excitation from one segment can evoke spikes in adjacent segments with intact recurrent inhibition, but these responses are abolished by glutamatergic antagonists. An example of such a recording is illustrated in A, which overlays the Mn positions within optical fields colour-coded by position, on top of a low-magnification image (A, left) of a coronal L4-5 preparation from a ChAT-GCaMP6s mouse in which Mns express GCaMP6s. A suction pipette was used to stimulate the L5 ventral root (VR) while acquiring fluorescence intensities throughout each field (A, middle). Changes in Mn fluorescence were measured and plotted against time (A, right) under control conditions (CTR) in the presence of pharmacological blockade of inhibition (+STR+GBZ) and addition of further antagonists to block glutamatergic neurotransmission (+APV+NBQX). The results for this experiment are summarised in graph B, in which running medians and inter-quartile ranges of responses are plotted for the three conditions against the distance from the L4-5 border (rostral positive). Recurrent excitation from L5 evoked firing in Mns throughout the L4 segment and these responses were enhanced by inhibitory antagonists and abolished by glutamatergic blockade. These effects are illustrated by the graphs in C which plots the signal response under control conditions with that in the presence of antagonists of inhibition (C, left) and glutamatergic blockade (C, right), preserving the colour-coding of position in the rostral-caudal axis used in panel A. Violin plots summarise the group data, comparing intra-segmental and inter-segmental responses, showing the distribution of the magnitude of responses from all Mns under control conditions (D, left), inhibitory blockade (E, middle; on a different  $y$ -scale), and in the additional presence of glutamatergic antagonists (D, right).
